# Supplementary material for: Anti-inflammatory activities of Gardenia jasminoides extracts in retinal pigment epithelial cells and zebrafish embryos
Source: PubMed Central journal article supplement — Exp Ther Med. 2021 May 2;22(1):700. doi: 10.3892/etm.2021.10132 (PMC8120509; doi:10.3892/etm.2021.10132), 2021-05-02
Supplement: Supplementary_Data.pdf [file Supplementary_Data.pdf]

Table SI. Human primers.

| Genes          | Forward primers 5'-3'  | Reverse primers 5'-3' |
|----------------|------------------------|-----------------------|
| $\beta$ -actin | TCCACGAAACTACCTTCAACTC | GTCATACTCCTGCTTGCTGAT |
| TNF $\alpha$   | ATGCAGTTTGGCCAAGGAGA   | GCTTCTCAACAACCCTCTGA  |
| IL1- $\beta$   | GCTGAGGAAGATGCTGGTTC   | TCCATATCCTGTCCCTGGAG  |
| IL-6           | ATGTAGCCGCCACACAGA     | CATCCATCTTTTCAGCCAT   |

Table SII. Zebrafish primers.

| Genes                   | Forward primers 5'-3' | Reverse primers 5'-3'  |
|-------------------------|-----------------------|------------------------|
| $\beta$ -actin          | ACTGTATTGTCTGGTGGTAC  | ATCTCCTGCTTGCTAATCC    |
| IL-1 $\beta$            | TTCCCAAGTGCTGCTTATT   | AAGTTAAAACCGCTGTGGTCA  |
| IL-6                    | TCAACTTCTCCAGCGTGATG  | TCTTCCCTCTTTTCCCTCCTG  |
| TNF- $\alpha$           | ACCAGGCCTTTTCTTCAGGT  | GCATGGCTCATAAGCACTTGTT |
| NFkB activating protein | AGAGAGCGCTTGCGTCCTT   | TTGCCTTTGGTTTTTCGGTAA  |
| TLR4b                   | GGGAAGTCAATCGCCTCCA   | ACGGCTGCCCATTTTCCT     |
